# Supplementary material
Source: PubMed Central journal article supplement (PMC5679468)
Supplement: NIHMS905702-supplement-8.pdf [file NIHMS905702-supplement-8.pdf]

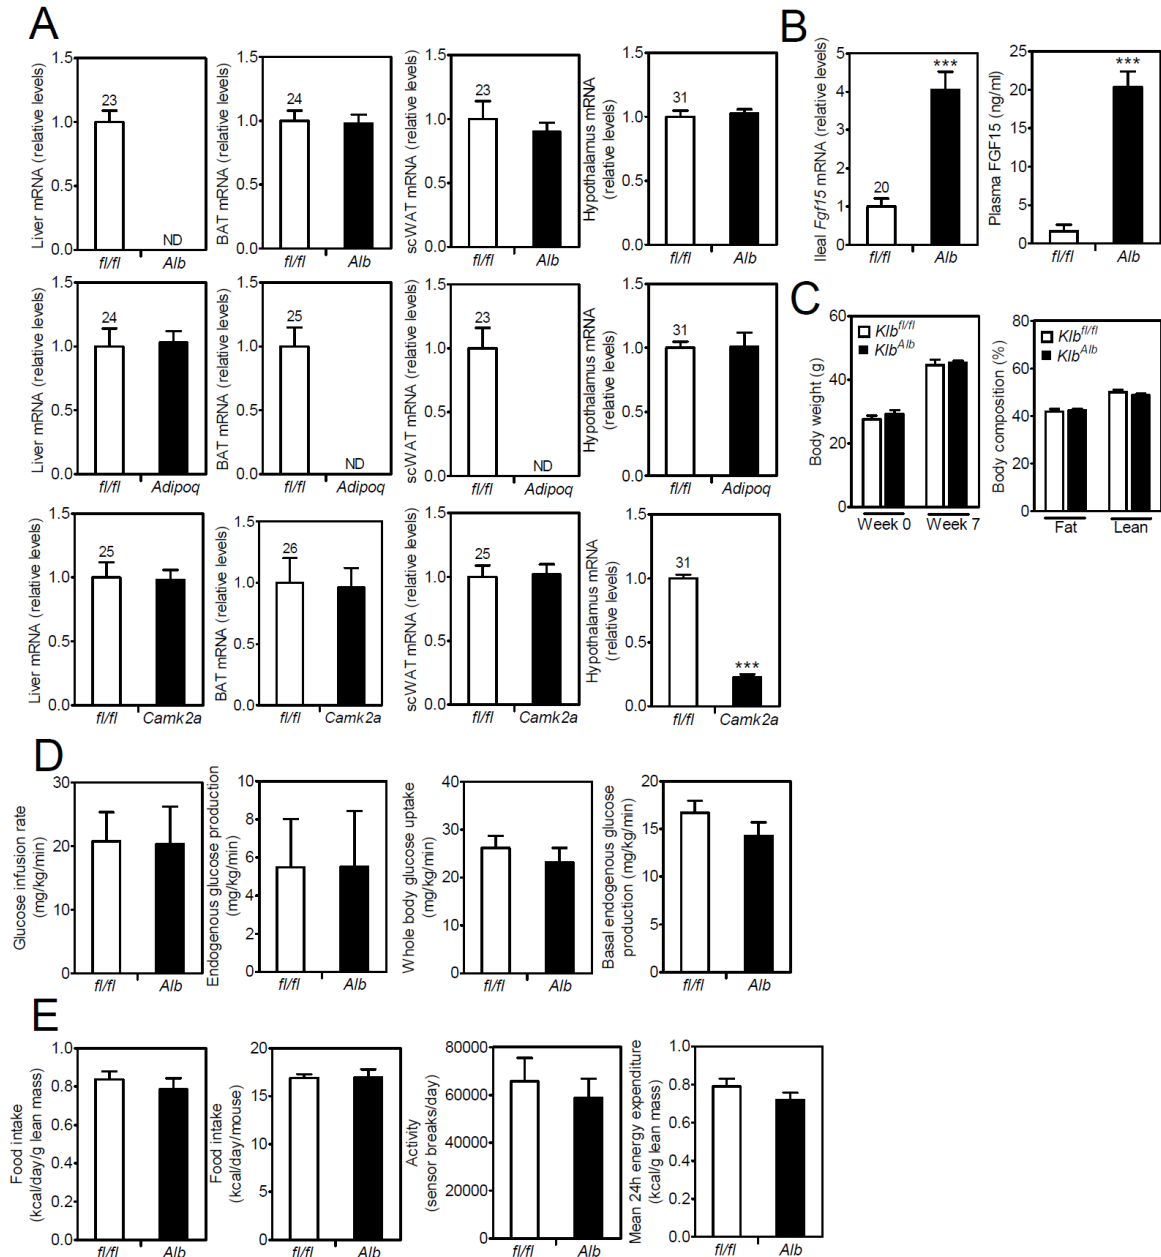

**Figure S1, related to Figure 1, Figure 2, Figure 4 and Figure 5.  $\beta$ -Klotho expression in tissue-specific  $\beta$ -Klotho knockout mouse models and metabolic comparison between  $Klb^{fl/fl}$  and  $Klb^{Alb}$  mice.**

(A) qPCR analysis of  $\beta$ -Klotho mRNA levels in liver, BAT, scWAT and hypothalamus in DIO  $Klb^{Alb}$  mice,  $Klb^{Adipoq}$  mice,  $Klb^{Camk2a}$  mice and their corresponding DIO  $Klb^{fl/fl}$  littermates. qPCR cycle time values are shown for the  $Klb^{fl/fl}$  group. n = 5-6/group.

(B) Ileal *Fgf15* mRNA levels and plasma FGF15 protein levels in DIO  $Klb^{fl/fl}$  and  $Klb^{Alb}$  littermates. qPCR cycle time values are shown for the  $Klb^{fl/fl}$  group. n = 5-7/group.

(C) Body weight in chow-fed lean and DIO  $Klb^{fl/fl}$  and  $Klb^{Alb}$  littermates after 7 weeks on high-fat diet (left panel). Body composition in DIO  $Klb^{fl/fl}$  and  $Klb^{Alb}$  littermates after 7 weeks on high-fat diet (right panel). n = 8/group.

(D) Hyperinsulinemic-euglycemic clamp was performed in DIO  $Klb^{fl/fl}$  and  $Klb^{Alb}$  littermates. Glucose infusion rate, endogenous glucose production and whole-body glucose uptake during the clamp and basal endogenous glucose production measured. n = 5/group.

(E) 24hr food intake, activity and energy expenditure were measured in DIO  $Klb^{fl/fl}$  and  $Klb^{Alb}$  littermates. n = 8/group.

Data are shown as the mean  $\pm$  SEM. \*p < 0.05, \*\*p < 0.01, \*\*\*p < 0.001 compared to control. ND, not detected.

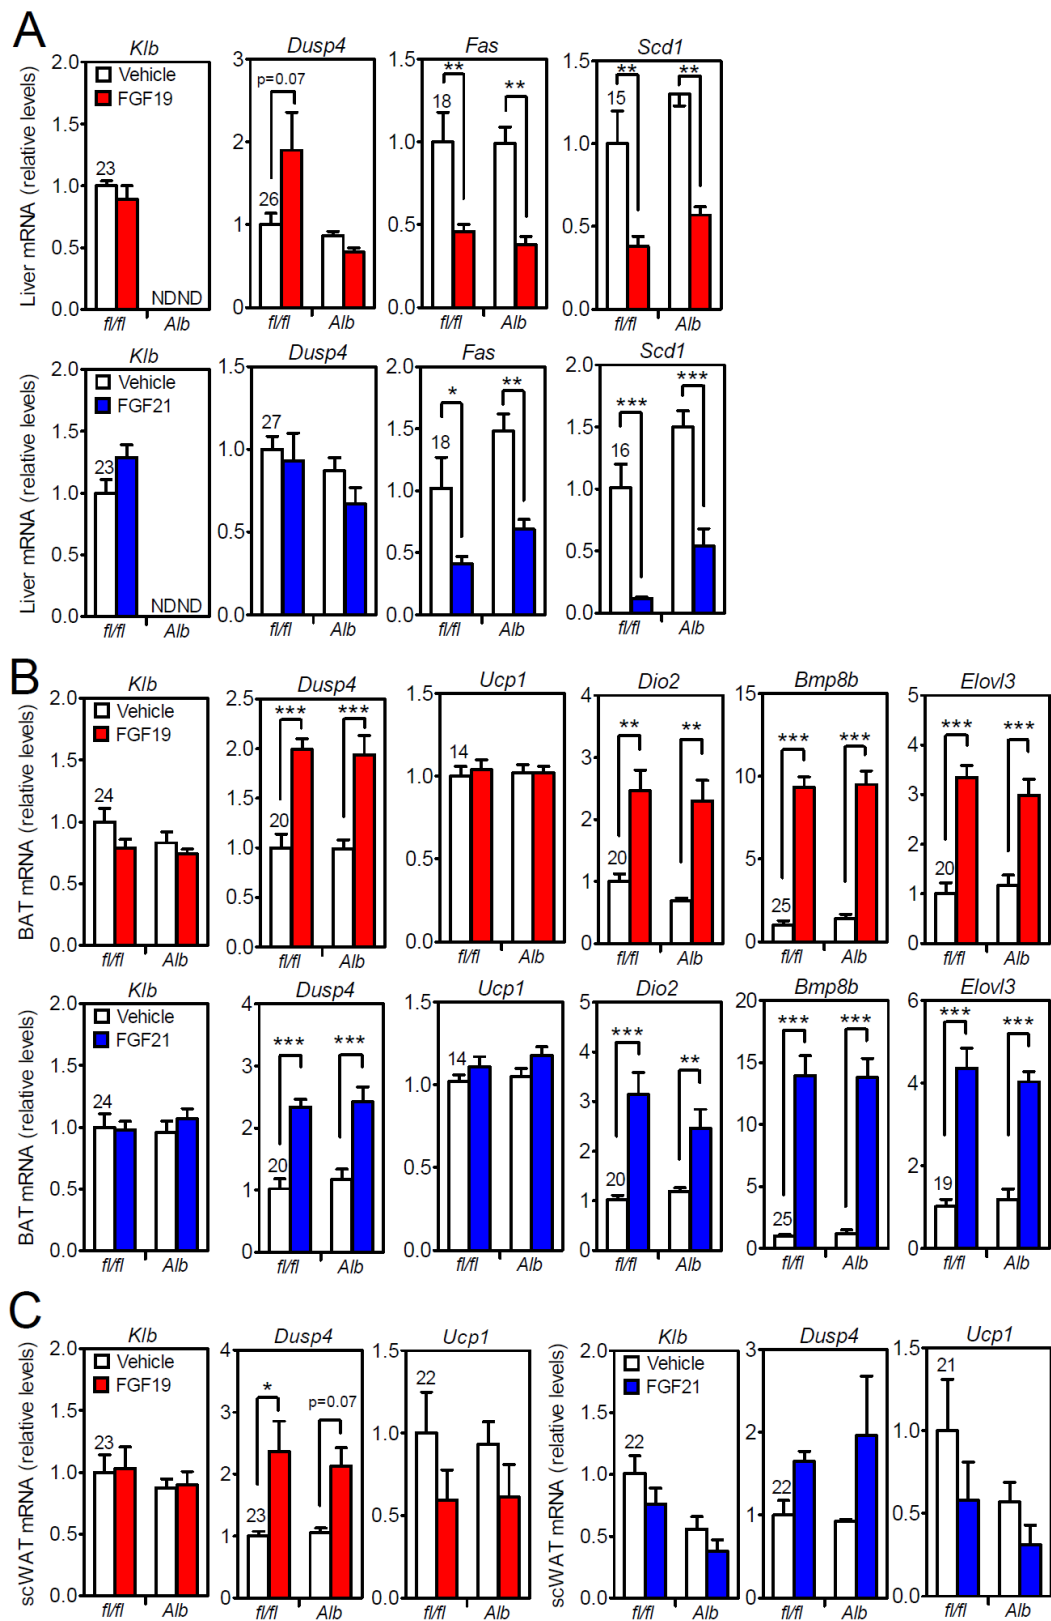

**Figure S2, related to Figure 2. Gene expression in control and liver-specific  $\beta$ -Klotho knockout mice.** (A-C) QPCR analysis of gene expression in (A) liver, (B) BAT and (C) scWAT. QPCR cycle time values are shown for the vehicle-treated *Klb<sup>fl/fl</sup>* group. Data are shown as the mean  $\pm$  SEM. \* $p < 0.05$ , \*\* $p < 0.01$ , \*\*\* $p < 0.001$  compared to control. ND, not detected.

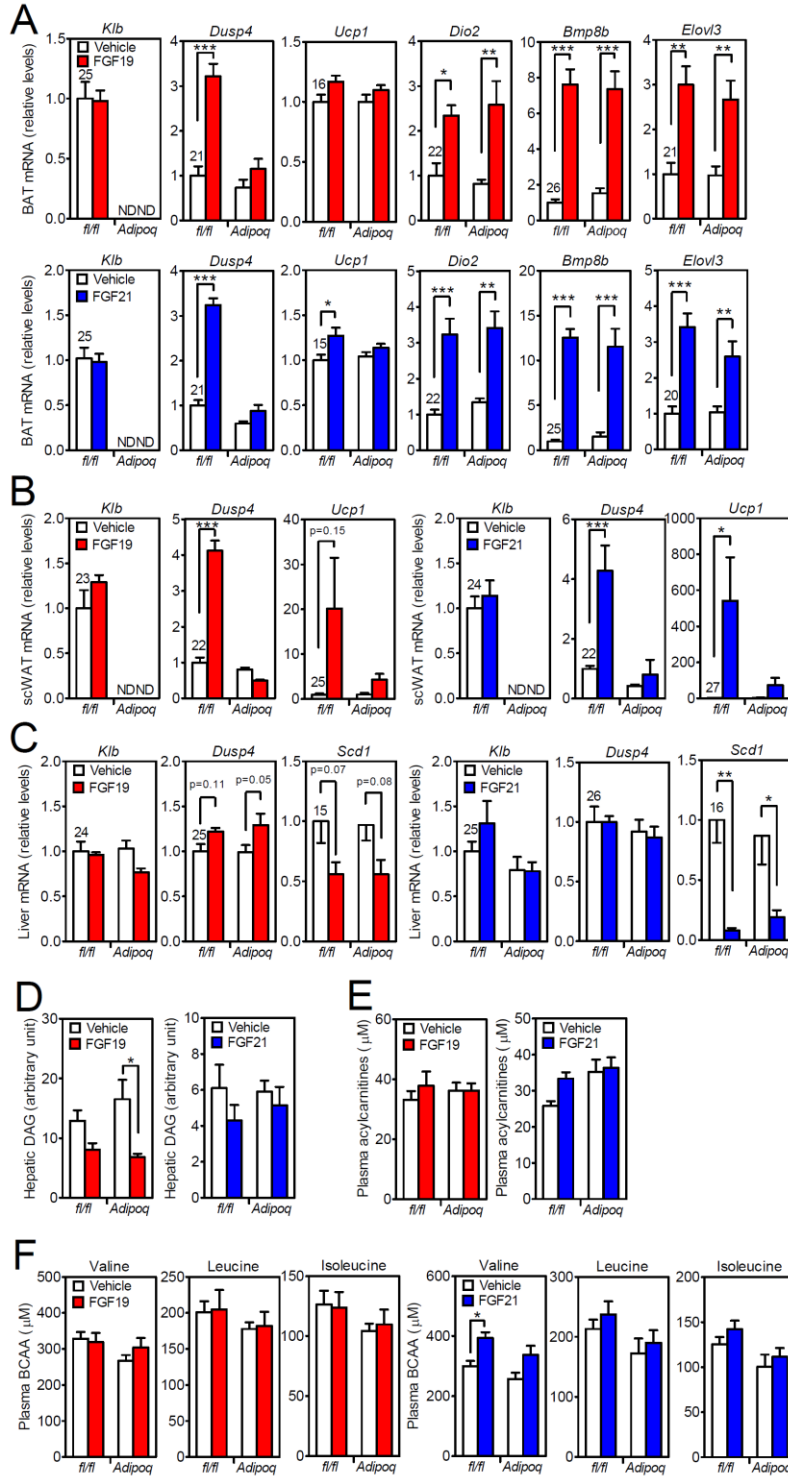

**Figure S3, related to Figure 4. Gene expression, hepatic diacylglycerol levels and plasma acylcarnitines and branched-chain amino acid levels in control and adipose tissue-specific  $\beta$ -Klotho knockout mice.**

(A-C) QPCR analysis of gene expression in (A) BAT, (B) scWAT and (C) liver. QPCR cycle time values are shown for the vehicle-treated  $Klb^{fl/fl}$  group.

(D) Hepatic diacylglycerol (DAG) levels.

(E) Plasma acylcarnitine levels.

(F) Plasma branched-chain amino acid (BCAA) levels.

Data are shown as the mean  $\pm$  SEM. \* $p < 0.05$ , \*\* $p < 0.01$ , \*\*\* $p < 0.001$  compared to control. ND, not detected.

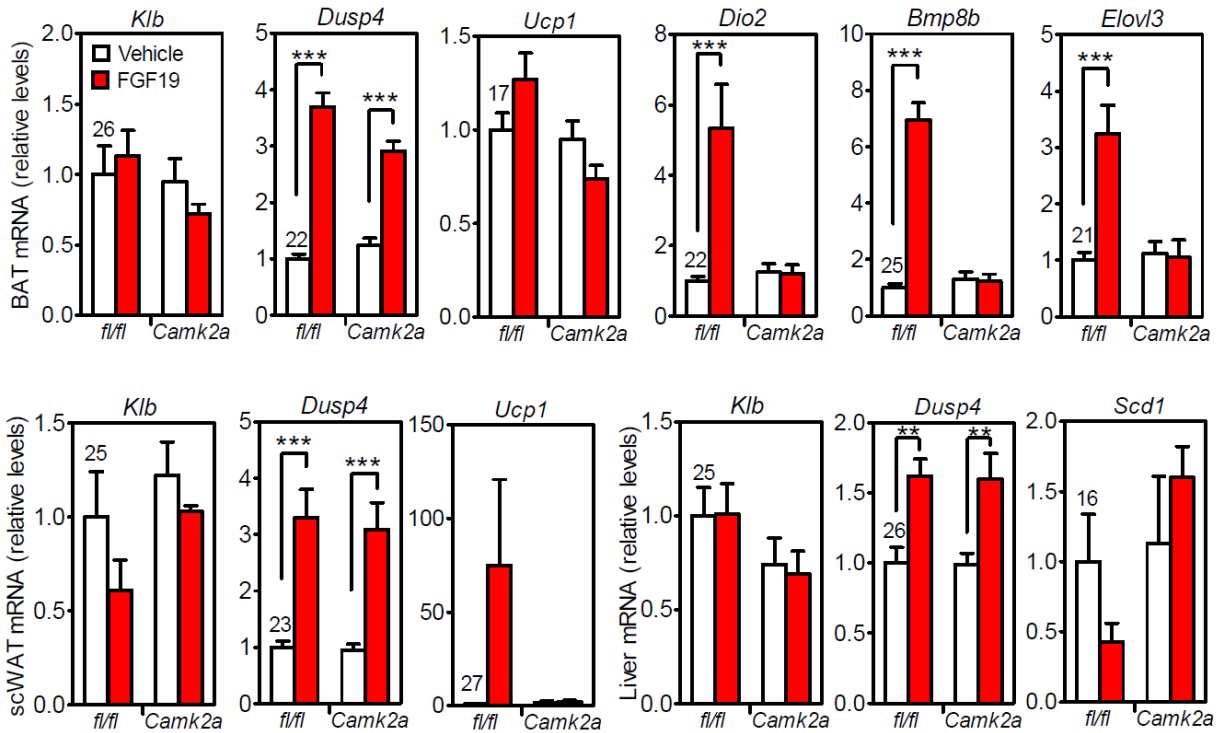

**Figure S4, related to Figure 5. Gene expression in control and nervous system-specific  $\beta$ -Klotho knockout mice.** QPCR analysis of gene expression in BAT, scWAT and liver. QPCR cycle time values are shown for the vehicle-treated  $Klb^{fl/fl}$  group. Data are shown as the mean  $\pm$  SEM. \* $p < 0.05$ , \*\* $p < 0.01$ , \*\*\* $p < 0.001$  compared to control.

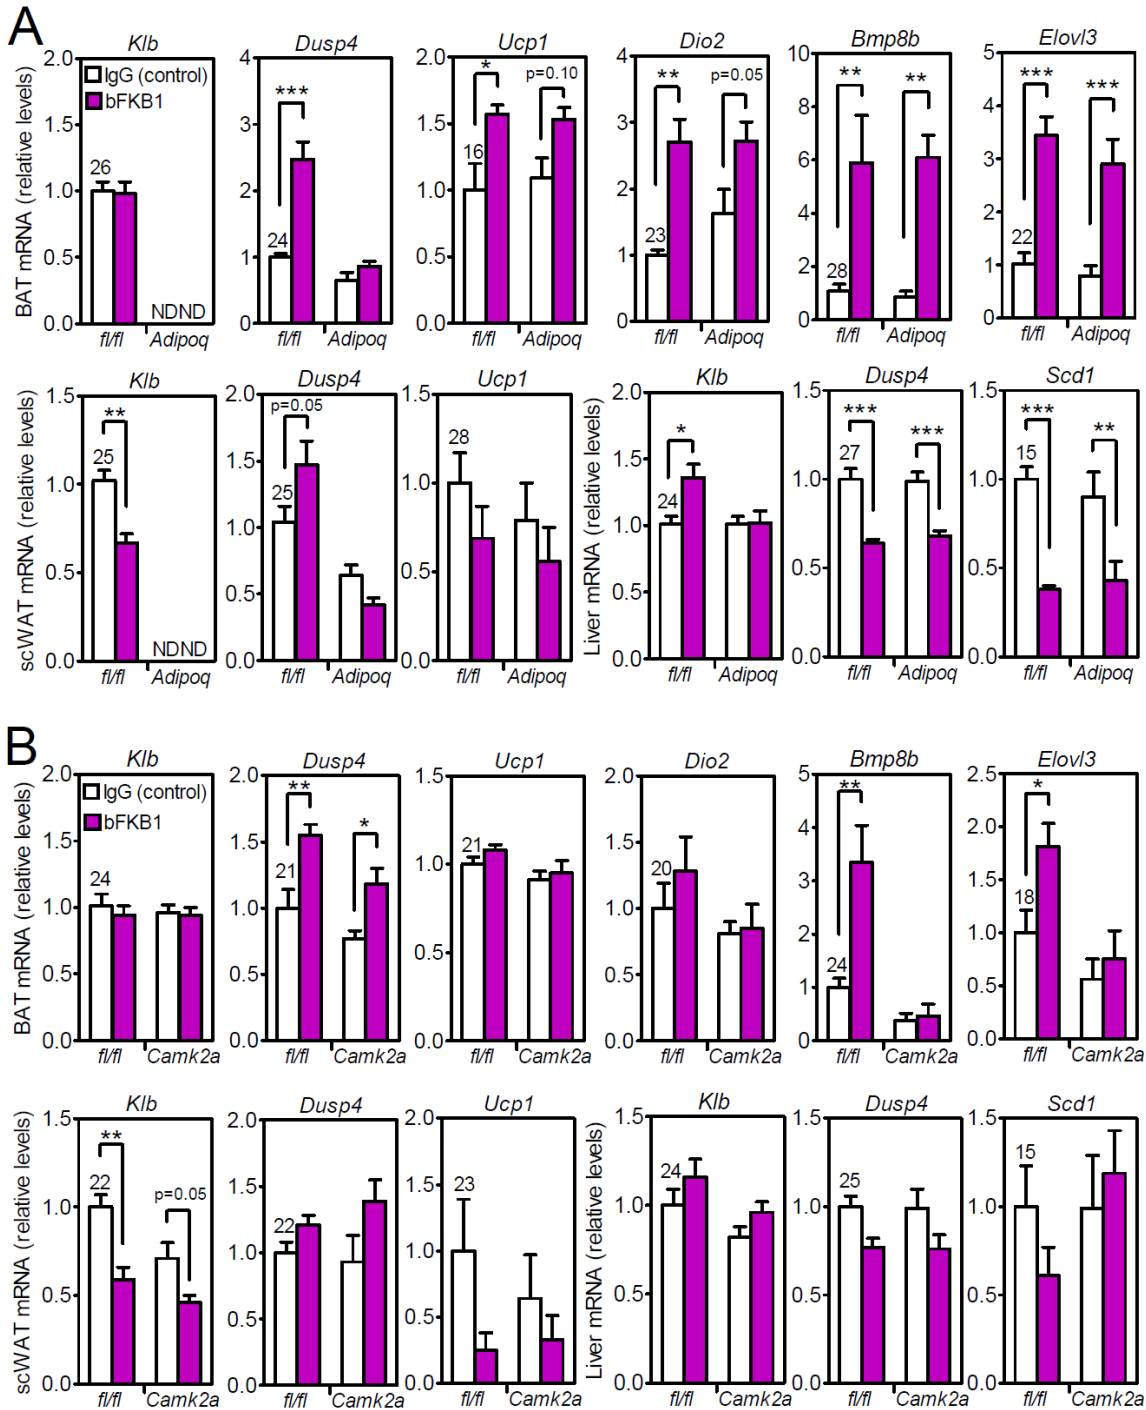

**Figure S5, related to Figure 6. Gene expression in mice treated with the FGFR1c/β-Klotho activating antibody.**

(A) QPCR analysis of gene expression in BAT, scWAT and liver in DIO *Klb<sup>fl/fl</sup>* and *Klb<sup>Adipoq</sup>* littermates administered either bFKB1 or control antibody (trastuzumab) for 4 wk. QPCR cycle time values are shown for the control antibody-treated *Klb<sup>fl/fl</sup>* group.

(B) QPCR analysis of gene expression in BAT, scWAT and liver in DIO *Klb<sup>fl/fl</sup>* and *Klb<sup>Camk2a</sup>* littermates administered either bFKB1 or control antibody (trastuzumab) for 4 wk. QPCR cycle time values are shown for the control antibody-treated *Klb<sup>fl/fl</sup>* group.

Data are shown as the mean ± SEM. \*p < 0.05, \*\*p < 0.01, \*\*\*p < 0.001 compared to control. ND, not detected.

**Table S1, related to Figure S1-S5. Summary of primers used for QPCR analyses.**

| <b>Gene Name</b> | <b>Primer Sequences</b>                                                    |
|------------------|----------------------------------------------------------------------------|
| <i>U36B4</i>     | Forward 5'cgtctcgttgaggatgaca3'<br>Reverse 5'cggtgcgtcagggattg3'           |
| <i>Bmp8b</i>     | Forward 5'accaaccacgccactatgc3'<br>Reverse 5'cagtaggcacacagcacacctt3'      |
| <i>Cyp7a1</i>    | Forward 5'agcaactaacaacctgccagtacta3'<br>Reverse 5'gtccggatattcaaggatgca3' |
| <i>Dio2</i>      | Forward 5'gtccgcaaatgacctt3'<br>Reverse 5'cccaccactctctgactt3'             |
| <i>Dusp4</i>     | Forward 5'accacaagccgacatcag3'<br>Reverse 5'gtccttactgcgtcgatgtact3'       |
| <i>Egr1</i>      | Forward 5'cgagcgaacaacctatgag3'<br>Reverse 5'cattattcagagcgatgtcagaaa3'    |
| <i>Elov13</i>    | Forward 5'cttcgagacgttcaggacttaag3'<br>Reverse 5'tctggccaacaacgatgag3'     |
| <i>Fas</i>       | Forward 5'gctgcggaacttcaggaat3'<br>Reverse 5'agagacgtgtcactcctggactt3'     |
| <i>Fgf15</i>     | Forward 5'acgggctgattcgtactc3'<br>Reverse 5'tgtagcctaaacagtccatttct3'      |
| <i>Klb</i>       | Forward 5'gatgaagaattcctaaccaggtt3'<br>Reverse 5' aaccaaacacgcggattt3'     |
| <i>Scd1</i>      | Forward 5'tgcccctgeggatctt3'<br>Reverse 5'gccattcgtacacgtcatt3'            |
| <i>Ucp1</i>      | Forward 5'aagctgtcggatgtccatgt3'<br>Reverse 5'aagccacaacctttgaaa3'         |
