# Supplementary material
Source: PubMed Central journal article supplement (PMC5679468)

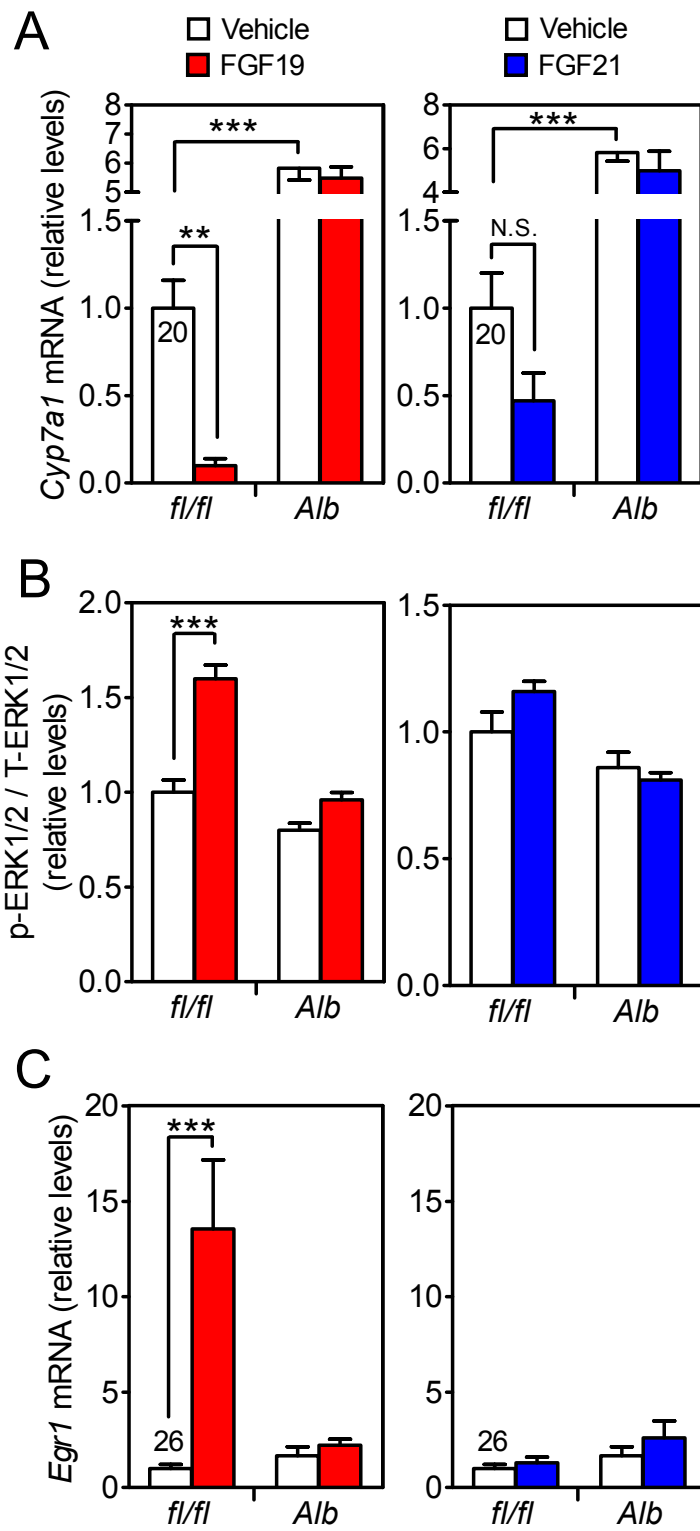

Figure 1

Supplement: NIHMS905702-supplement-1.pdf [file NIHMS905702-supplement-1.pdf]

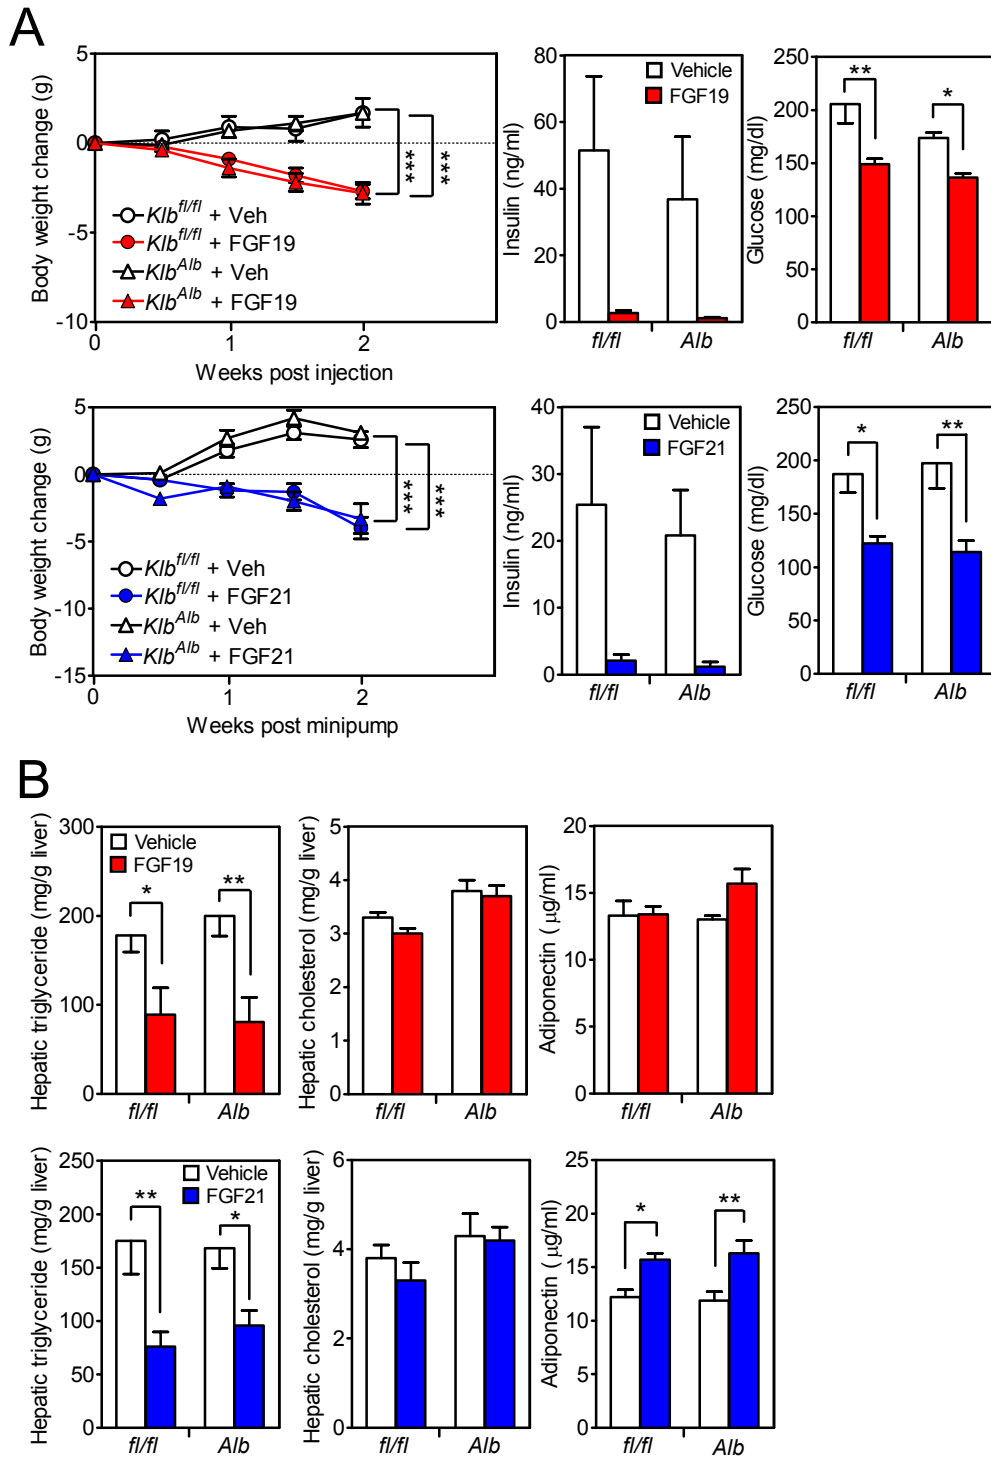

Figure 2

Supplement: NIHMS905702-supplement-2.pdf [file NIHMS905702-supplement-2.pdf]

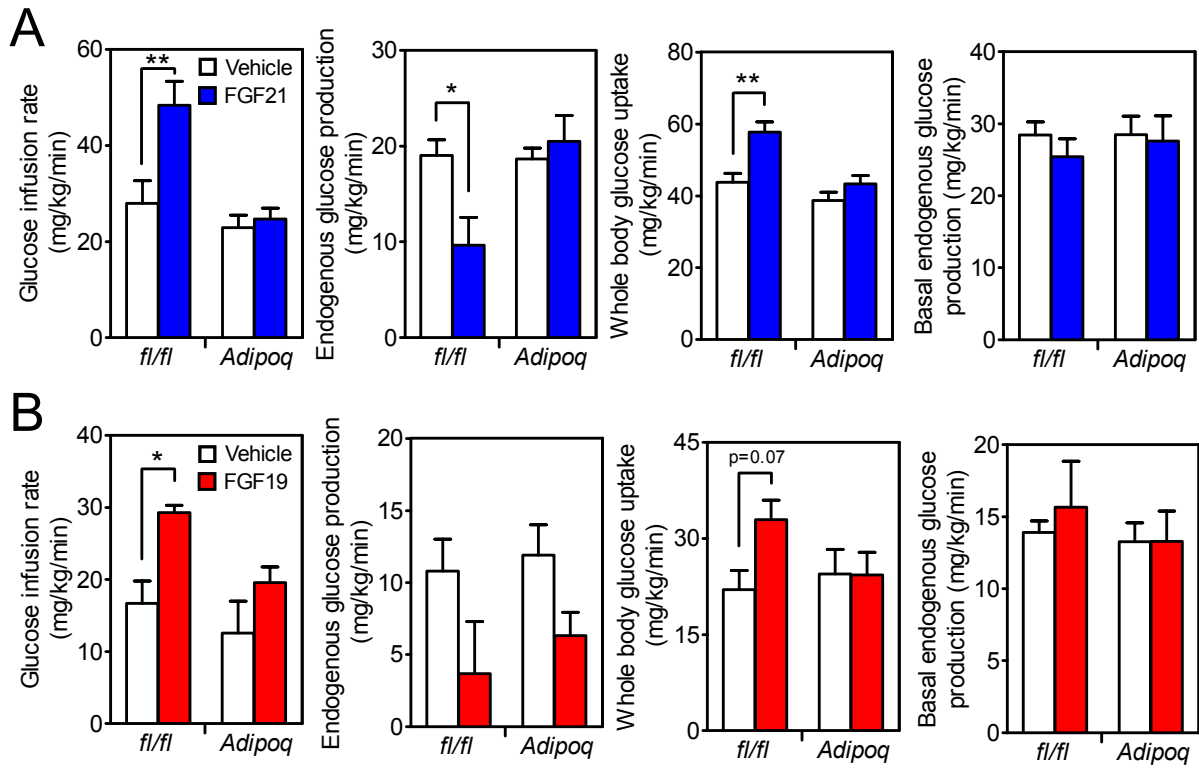

Figure 3

Supplement: NIHMS905702-supplement-3.pdf [file NIHMS905702-supplement-3.pdf]

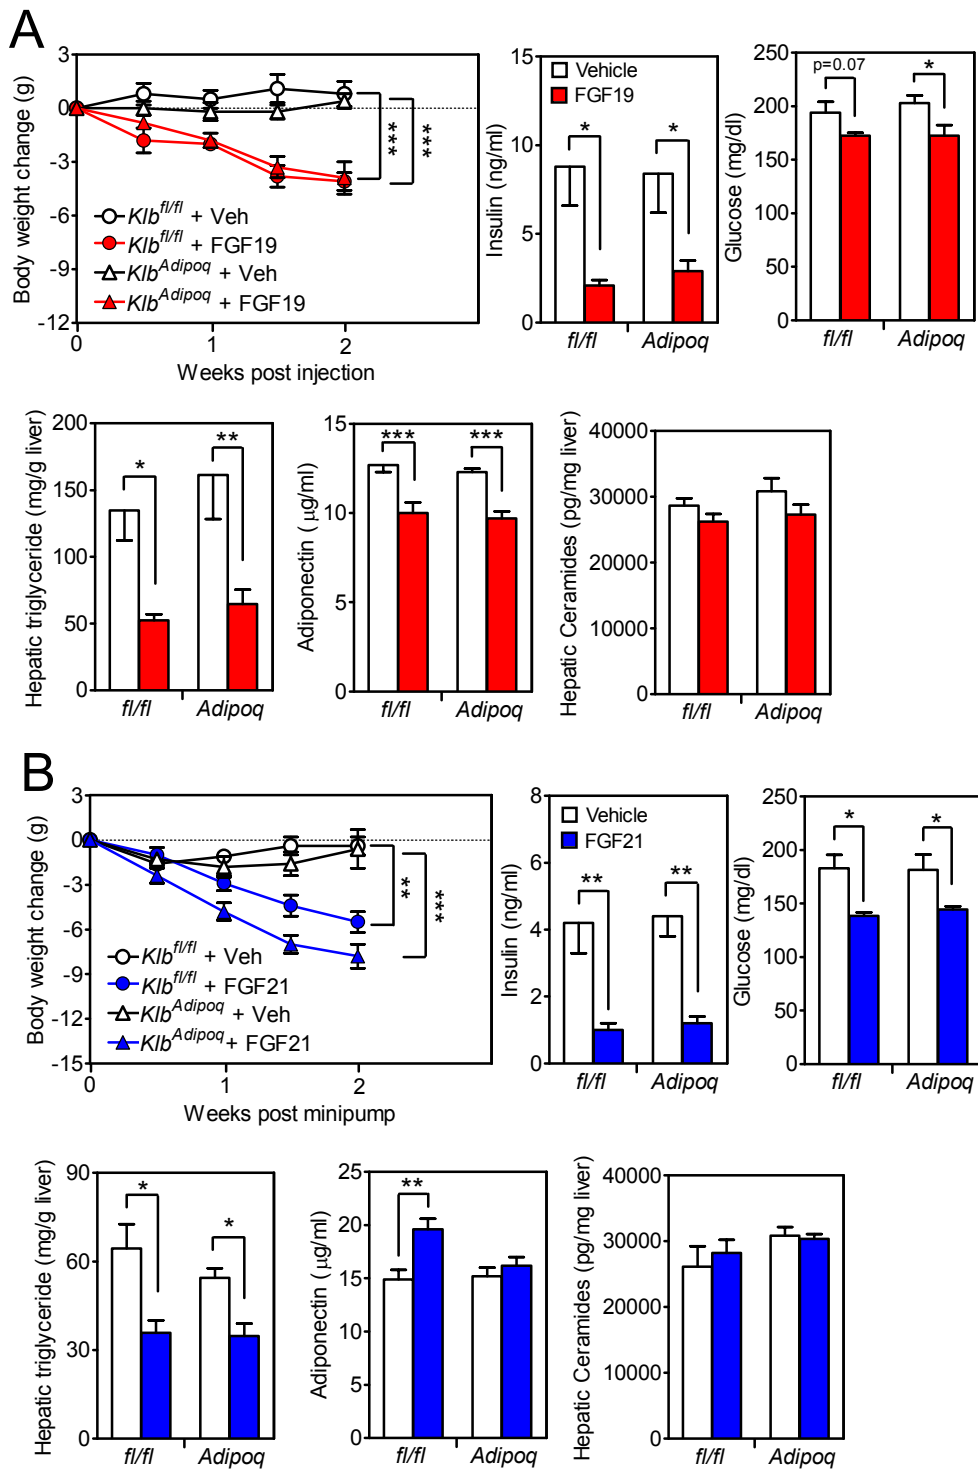

Figure 4

Supplement: NIHMS905702-supplement-4.pdf [file NIHMS905702-supplement-4.pdf]

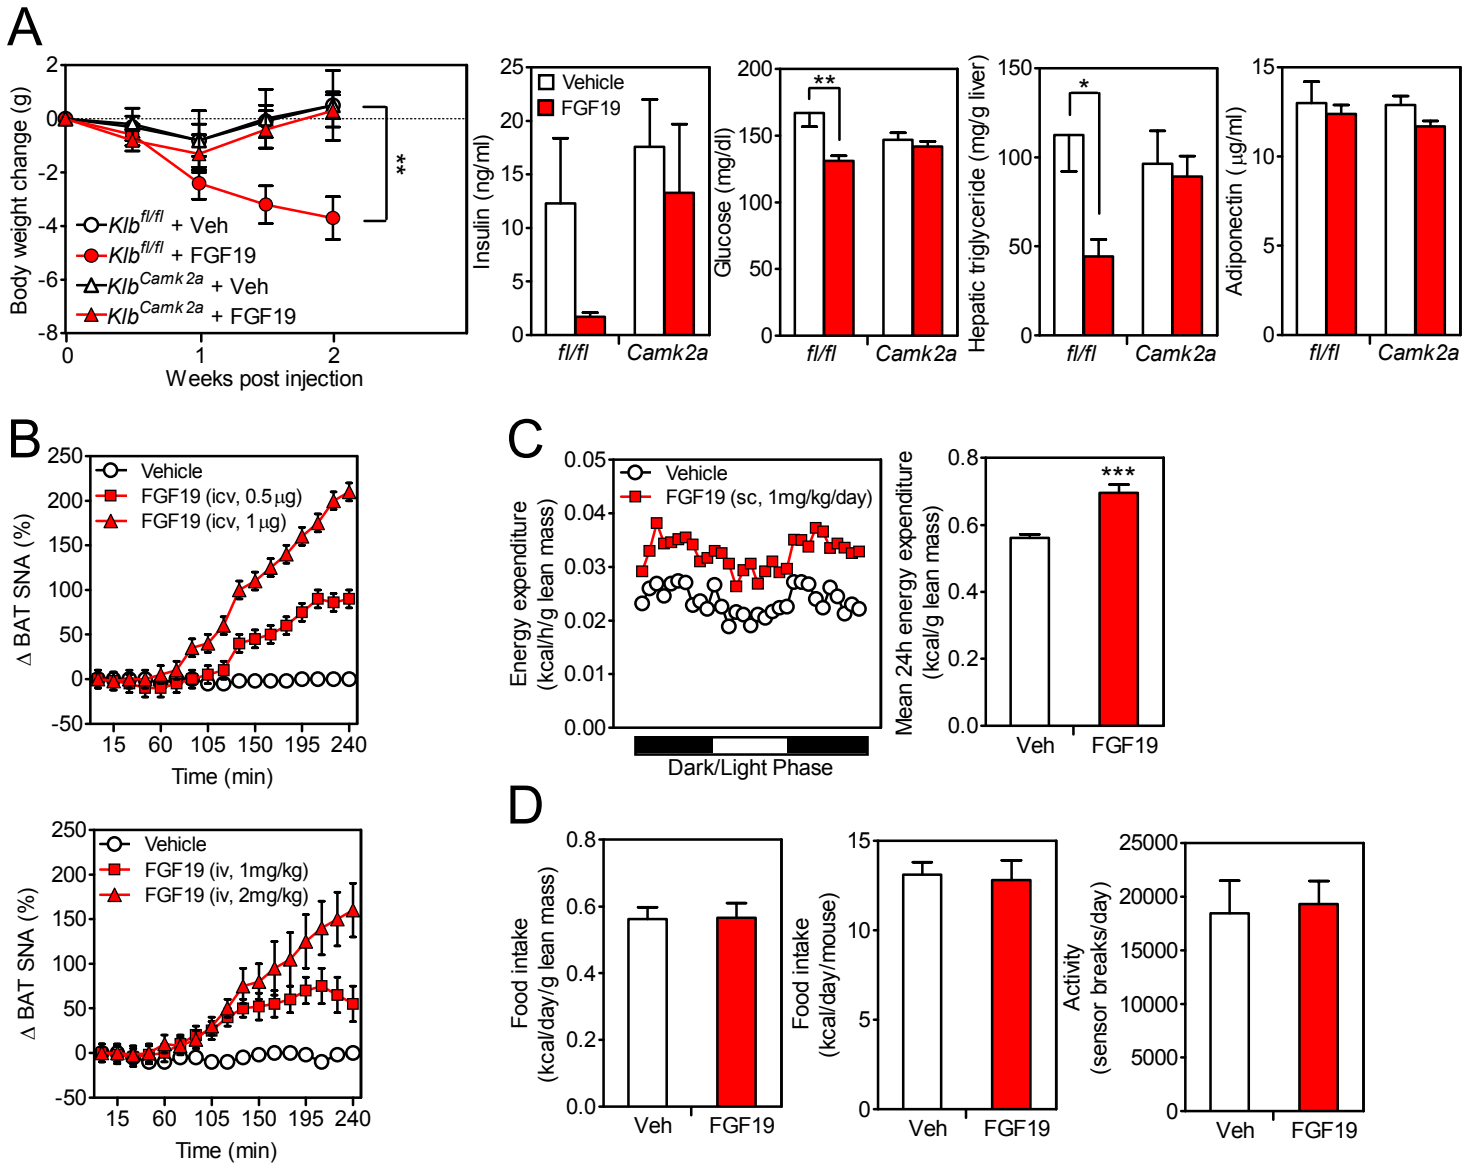

Figure 5

Supplement: NIHMS905702-supplement-5.pdf [file NIHMS905702-supplement-5.pdf]

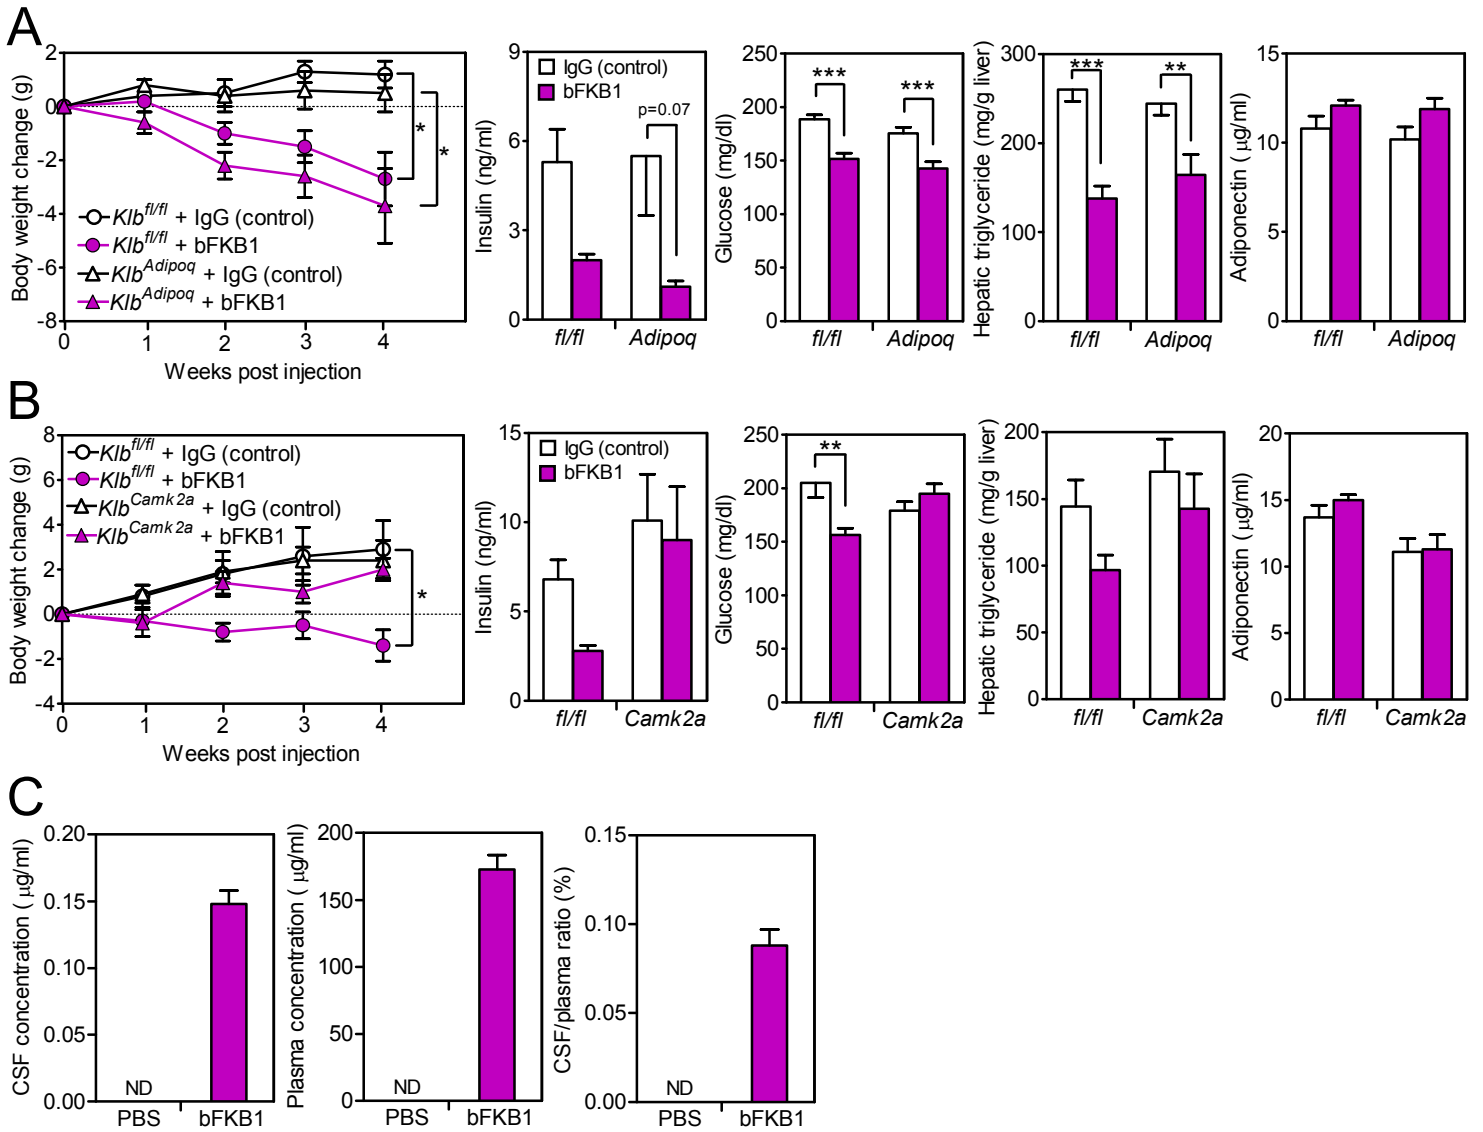

Figure 6

Supplement: NIHMS905702-supplement-6.pdf [file NIHMS905702-supplement-6.pdf]
